# Supplementary material for: X-ray structure and magnetic and fluorescence characteristics of new Cu(ii) complexes with Schiff bases derived from 2-(2-aminoethyl)pyridine and 2-hydroxy-1-naphthaldehyde; morphology and fluorescence of their thin films
Source: Royal Society of Chemistry journal article supplement (doi:10.1039/c8dt03208d), 2018-01-01
Supplement: c8dt03208d1.pdf [file c8dt03208d1.pdf]

## **X-ray structure, magnetic and fluorescence characteristics of new Cu(II) complexes with Schiff bases derived from 2-(2-aminoethyl)pyridine and 2-hydroxy-1-naphthaldehyde; morphology and fluorescence of their thin films**

M. Barwiolek<sup>\*a</sup>, E. Szlyk<sup>a</sup>, A. Kozakiewicz<sup>a</sup>, T. Muziol<sup>a</sup>, A. Bieńko<sup>b</sup>, J. Jezierska<sup>b</sup>

<sup>a</sup>Faculty of Chemistry, Nicolas Copernicus University in Torun, 87-100 Torun, Poland.

e-mail: mbarwiolek@umk.pl, Fax: +48 (56) 611 45 16; Tel: + 48 (56) 611 45 16

<sup>b</sup>Faculty of Chemistry, University of Wrocław, 47 Juliet-Curie, 50-137 Wrocław, Poland.

### **Supplementary Materials**

**Figure S1.** Structural formula and atomic numbering scheme for 1-[(2-pyridin-2-yl-ethylimino)-methyl]-naphthalen-2-ol (HPEMN) **L1**.

**Figure S2.** TG-DTA traces of [Cu(II)(PEMN))(CH<sub>3</sub>COO)]CH<sub>3</sub>Cl **1**.

**Figure S3.** TG-DTA traces of [Cu(II)(PEMN)Cl] **2**.

**Figure S4.** TG-DTA traces of [Cu(II)(PEMN)NO<sub>3</sub>] **3**.

**Figure S5.** TG-DTA traces of [Cu(II)(PEMN)CH<sub>3</sub>COO] CH<sub>3</sub>Cl **1**. under nitrogen

**Figure S6.** TG-DTA traces of [Cu(II)(PEMN)Cl] **2**. under nitrogen

**Figure S7.** TG-DTA traces of [Cu(II)(PEMN)NO<sub>3</sub>] **3** under nitrogen.

**Figure S8.** The Uv-vis spectrum of a) complex **3**, b) **1**, c) **2** in the solution (blue) and in the solid state (pink).

**Figure S9.** AFM image of [Cu(II)(PEMN)(CH<sub>3</sub>COO)]CH<sub>3</sub>Cl **1**/Si/PMMA, 2000 rpm, 5s x5, a) height, b) phase, c) amplitude scan size 10 μm. Phase images map material property including mechanical, chemical, and viscoelastic. Amplitude- the image of height, in which the dimension of z axis was reduced.

**Figure S10.** AFM image of [Cu(II)(PEMN))Cl] **2**/Si/PMMA, 2000 rpm, 5s x5, a) height, b) phase, c) amplitude scan size 10 μm.

### ***Synthesis of ligand HPEMN L1***

To 2-hydroxy-1-naphthaldehyde 1.722 g (10 mmol) dissolved in dichloromethane 1.19 ml (10 mmol) of 2-(2-pyridyl)ethylamine was added. The mixture was stirred during 1 h, color was changed from yellow to orange. The slow evaporation of the solvent resulted in the orange oil.

$^1\text{H}$  [ppm]: 3.31 (t, 2H)  $\text{CH}_2$ -, 4.05 (t, 2H)  $\text{CH}_2$ -, 6.93 (d 1H), 7.15-7.23 (m, 2H) Ar-H; 7.28 (s, 1H), 7.31 (d, 1H), 7.35-7.37 (m, 1H) Ar-H; 8.61-8.62 (m, 1H) Ar-H; 8.67 (s, 1H) -NCH-; 14.41 (s, 1H) -OH.<sup>6</sup>

$^{13}\text{C}$  [ppm]: 172.7 (HC8N), 170.1 (C10), 158.3 (C11), 149.2 (C14, 15), 136.9 (C13), 135.2 (C12), 133.2 (C11), 128.5 (C3), 125.1 (C1), 126.8 (C5, 4), 124.8 (C16), 124.3 (C17), 122.1 (C18), 121.8 (C19), 110.9 (C2), 45.8 (C7), 38.1 (C6).  $^{15}\text{N}$  -68.86 ppm, -181.84 ppm. (Figure 1).

Selected FT-IR data (KBr,  $\text{cm}^{-1}$ ) 3055  $\nu_{\text{OH}}$ , 2930  $\nu_{\text{CH}_2}$ , 2723, 2635  $\nu_{\text{C-H}_{\text{Ar}}}$ , 1618  $\nu_{\text{C=N}}$ , 1592, 1550, 1475, 1435  $\nu_{\text{C=C}_{\text{Ar}}}$ , 1346, 1280  $\nu_{\text{C-N}_{\text{py}}}$ , 1247  $\nu_{\text{Ph-O}}$ , 1210, 956. Uv-Vis MeCN [nm]: 311, 397.

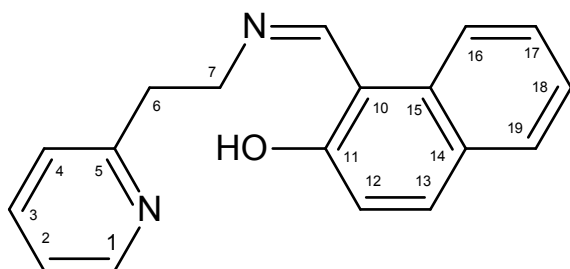

**Figure S1.** Structural formula and atomic numbering scheme for 1-[(2-pyridin-2-yl-ethylimino)-methyl]-naphthalen-2-ol (HPEMN) **L1**.

### Infrared spectroscopy

The IR spectra of ligand (HPEMN) **L1** exhibits band from -N=CH- stretching vibrations at  $1618\text{ cm}^{-1}$ . Additionally, spectrum of **L1** exhibits the Ph-O stretching vibration band at  $1247\text{ cm}^{-1}$ , whereas the -OH stretching vibration band was noted at  $3055\text{ cm}^{-1}$ . Upon complexation, the Ph-O stretching vibration band was shifted towards higher frequencies ( $1282\text{ cm}^{-1}$  for **1**,  $1256\text{ cm}^{-1}$  for **2** and  $1250\text{ cm}^{-1}$  for **3**), while  $\nu_{\text{OH}}$  bands disappeared.

Moreover, the band from azomethine stretching vibrations in **1** was noted at  $1603\text{ cm}^{-1}$ ,  $\Delta_{\text{coord}} = \Delta_{\text{comp}} - \Delta_{\text{lig}} = -17\text{ cm}^{-1}$  for **2** and  $-13$  for **3**, what confirms the copper binding by the -N=CH- group.

In the spectra of  $[\text{Cu(II)(PEMN)CH}_3\text{COO}]$  **1** the bands from symmetrical and asymmetrical stretching vibrations of the carboxylate group at  $1419\text{ cm}^{-1}$   $\nu_{\text{COO}^-}$  and  $1619\text{ cm}^{-1}$   $\nu_{\text{asCOO}^-}$  were registered,<sup>1-2</sup> suggesting the monodentate coordination.

The band from Cu-O stretching vibrations appeared at  $543\text{ cm}^{-1}$  for **1**, at  $541\text{ cm}^{-1}$  for **2** and at  $545\text{ cm}^{-1}$  for **3**.<sup>3</sup> Additionally, the band from Cu-Cl stretching vibrations were registered at:  $349\text{ cm}^{-1}$   $[\text{Cu(II)(PEMN)Cl}]$  **2**.<sup>1</sup> The presence of the bands from Cu-O, Cu-N and Cu-Cl stretching vibrations confirms the coordination *via* Ph-O, N and Cl ions, respectively. The nitrate anions in the IR spectrum of **3** revealed a split  $\text{E}_1(\nu_3)$  doubly degenerated asymmetric stretching of the NO bond at  $1365$  and  $1508\text{ cm}^{-1}$  frequencies. The calculated splitting parameter,  $\Delta_{\text{coord}}$ , for **3** was  $143\text{ cm}^{-1}$ . According to Nakamoto<sup>1</sup>, the observed magnitude of  $\Delta_{\text{coord}}$  can be related to the bidentately bonded  $\text{NO}_3^-$  ion. The values of  $\Delta_{\text{coord}}$  reported in the literature were larger in the case of bidentate coordination of the  $\text{NO}_3^-$  ion than those in the monodentate mode.<sup>1,4-5</sup> Summarizing IR results for the studied complexes it is evident that the copper(II) ions coordinate with the ligand *via* N or O atoms and  $\text{Cl}^-$ ,  $\text{CH}_3\text{COO}^-$  or  $\text{NO}_3^-$  ions.

### Thermal analysis

For all complexes the thermal decomposition studies were performed under air or under nitrogen. The thermal decomposition process was significantly different in dependence on the analysis atmosphere. When reaction was carried under nitrogen only one mass loss has been seen on the TG curves. (Figures S2-S7). The final product of decomposition was mixture of copper and copper oxide.

When the thermal decomposition was carried out under air the decomposition process was more complex.

Thermogram of compound  $[\text{Cu(II)(PEMN)(CH}_3\text{COO)}]\text{CH}_3\text{Cl}$  **1** reveals three peaks of the decomposition on DTG curve, which can be assigned to  $\text{CHCl}_3$ , acetate ion and piridine amine derivative ( $\text{C}_7\text{H}_8\text{N}_2$ ) molecules detachment (exp. 56.86%, cal. 56.8%). (Figure S2) Second DTG peak corresponds to 25.47% mass loss, what can be related to the rest molecule decomposition, followed by mixture of Cu and CuO formation at  $707^\circ\text{C}$ . The first endothermic peak appeared at  $143^\circ\text{C}$ , the next two endothermic at  $197^\circ\text{C}$ ,  $261^\circ\text{C}$ , and finally two exothermic peaks at  $409^\circ\text{C}$  and  $475^\circ\text{C}$  were noted.

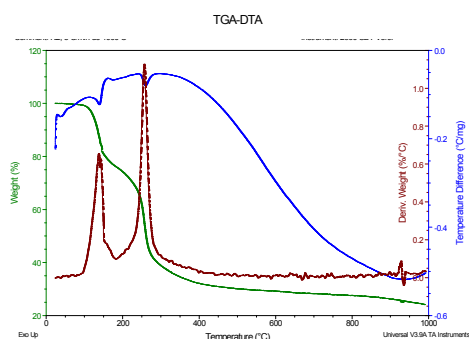

**Figure S2.** TG-DTA traces of  $[\text{Cu(II)(PEMN)}](\text{CH}_3\text{COO})\text{CH}_3\text{Cl}$  **1**.

Thermogram of **2** (Figure S3) exhibits seven DTG peaks with maxima at 185, 251, 231, 358, 388, 461 and 561°C, which on TG curve reveal two stages with 41.04 and 44.83% sample mass loss. The partial mass loss in the first step corresponds to the detachment of chloride ion and pirydyne amine derivative ( $\text{C}_7\text{H}_8\text{N}_2$ ) (cal. 41.58%). Further sample mass reduction is connected with the naphthyl molecule detachment (found 44.83%; cal. 44.6%) and copper oxide formation at 650°C.

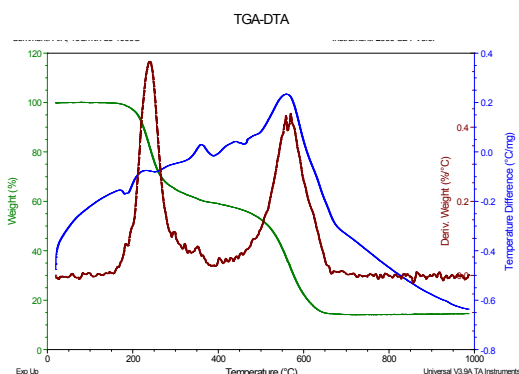

**Figure S3.** TG-DTA traces of  $[\text{Cu(II)(PEMN)Cl}]$  **2**.

Thermogram of **3** (Figure S4) over 123°C presents on TG curve continuous mass loss, starting from 123°C to 591°C, whereas the first endothermic stage can be observed on DTA curve at 161°C. Additionally, one endothermic peak at 227°C and two exothermic peaks at 261 and 469°C were noted. The mass loss corresponds the  $\text{NO}_3^-$  and pyridine derivative dissociation. Further sample mass reduction is connected with the naphthalene ring molecule detachment ( $\text{C}_{11}\text{H}_8\text{O}$ , found 39.52%; cal. 39.96%) and mixture of copper and 0.5 CuO formation (25.34/25.56%) at 591°C.

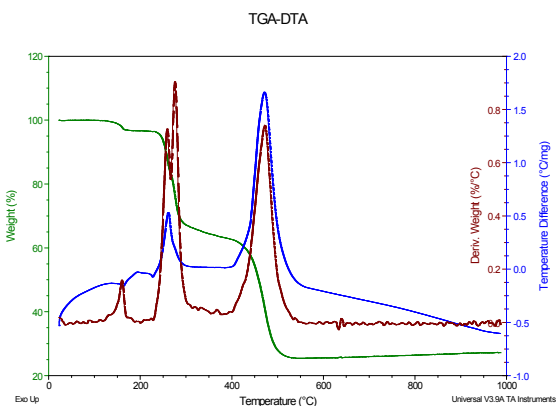

**Figure S4.** TG-DTA traces of  $[\text{Cu(II)(PEMN)NO}_3]$  **3**.

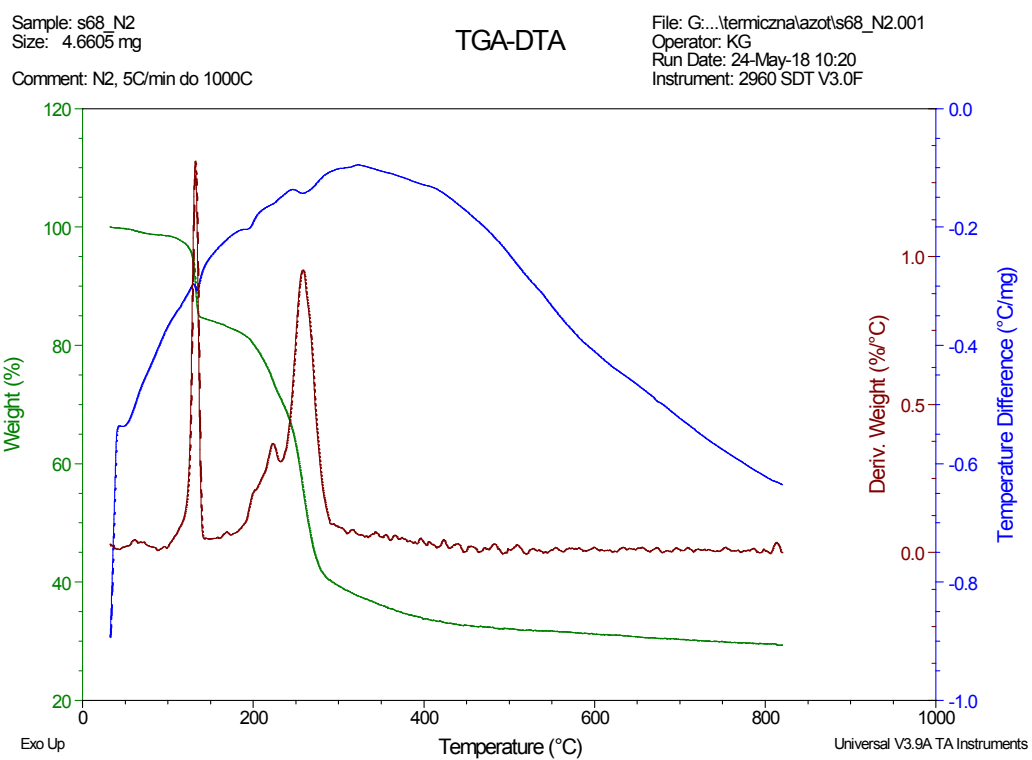

**Figure S5.** TG-DTA traces of  $[\text{Cu(II)(PEMN)CH}_3\text{COO}]\text{CH}_3\text{Cl}$  **1**. under nitrogen

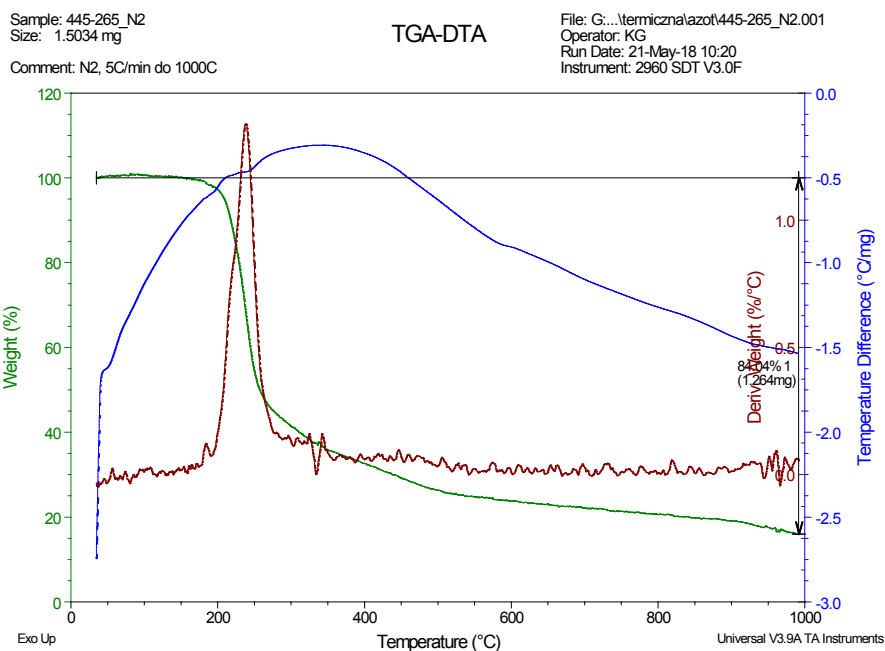

**Figure S6.** TG-DTA traces of  $[\text{Cu(II)(PEMN)Cl}] \mathbf{2}$  under nitrogen

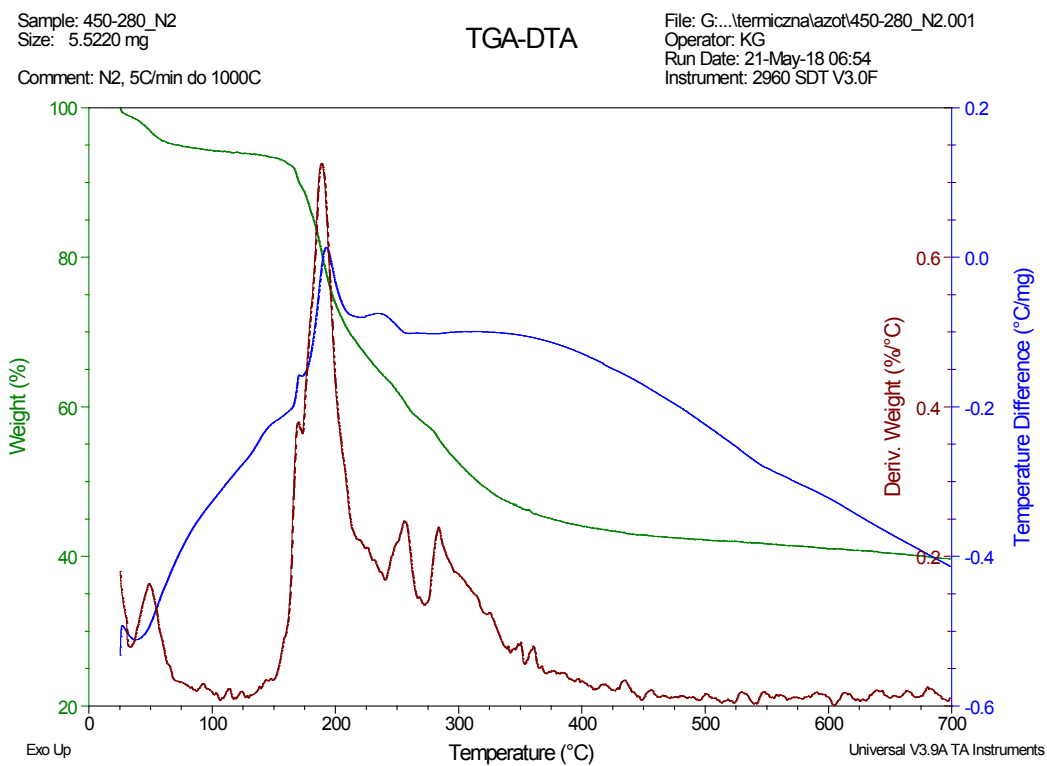

**Figure S7.** TG-DTA traces of  $[\text{Cu(II)(PEMN)NO}_3] \mathbf{3}$  under nitrogen.

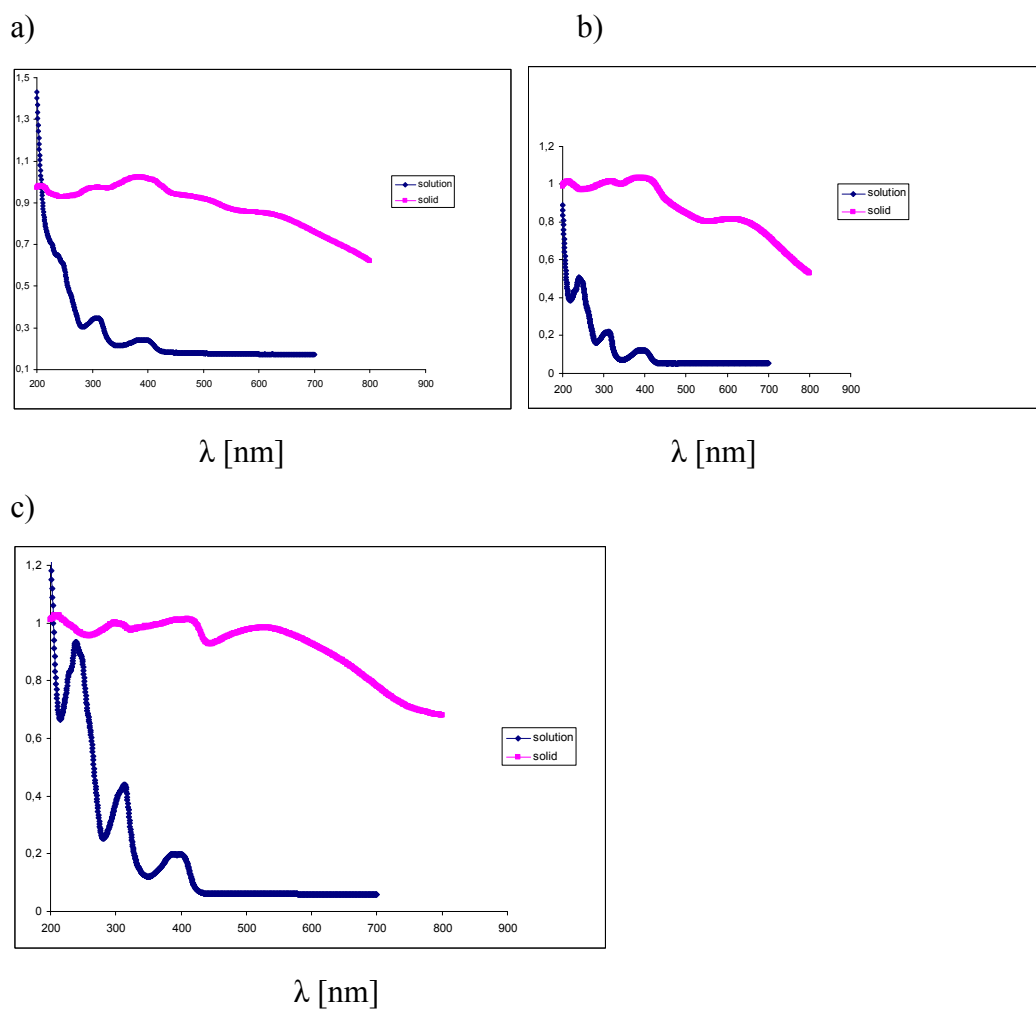

**Figure S8.** The Uv-vis spectrum of a) complex **3**, b) **1**, c) **2** in the solution (blue) and in the solid state (pink).

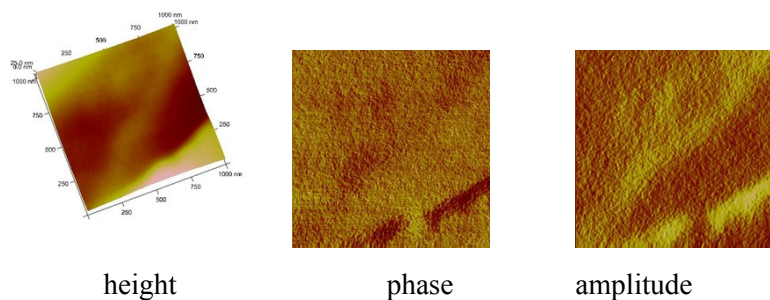

**Figure S9.** AFM image of  $[\text{Cu(II)(PEMN)(CH}_3\text{COO)}]\text{CH}_3\text{Cl 1/Si/PMMA}$ , 2000 rpm, 5s x5, a) height, b) phase, c) amplitude scan size 10  $\mu\text{m}$ . Phase images map material property including mechanical, chemical, and viscoelastic. Amplitude- the image of height, in which the dimension of  $z$  axis was reduced.

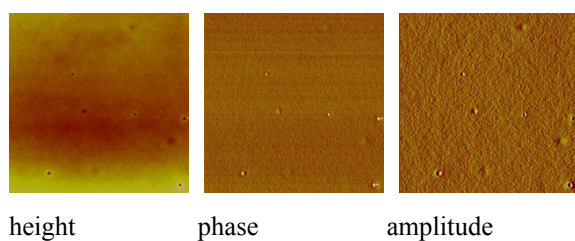

**Figure S10.** AFM image of  $[\text{Cu(II)(PEMN))Cl}] \text{ 2/Si/PMMA}$ , 2000 rpm, 5s x5, a) height, b) phase, c) amplitude scan size 10  $\mu\text{m}$ .

## References

- 1 K. Nakamoto, *Infrared and Raman Spectra of Inorganic and Coordination Compounds*, Wiley, New York.
- 2 P. Gluvchinsky and G. M. Mockler, *Spectrochim. Acta*, Part A, 1997, **33**, 1073.
- 3 E. Hadjoudis, A. Rontoyianni, K. Ambroziak, T. Dziembowska and I. M. Mavridis, *J. Photochem. Photobiol.*, A, 2004, **162**, 521.
- 4 A. B. P. Lever, E. Mantovani and B. S. Ramaswamy, *Cand. J. Chem.*, 1970, **49**, 1957.
- 5 D. N. Sathyanarayana, *Vibrational Spectroscopy: Theory and Applications*, first ed., New Age International Pvt Ltd Publishers, 2011.
